# Supplementary material
Source: PubMed Central journal article supplement (PMC2656169)
Supplement: 0813376106_0813376106SI.pdf [file 0813376106_0813376106SI.pdf]

# Supporting Information

Wang et al. 10.1073/pnas.0813376106

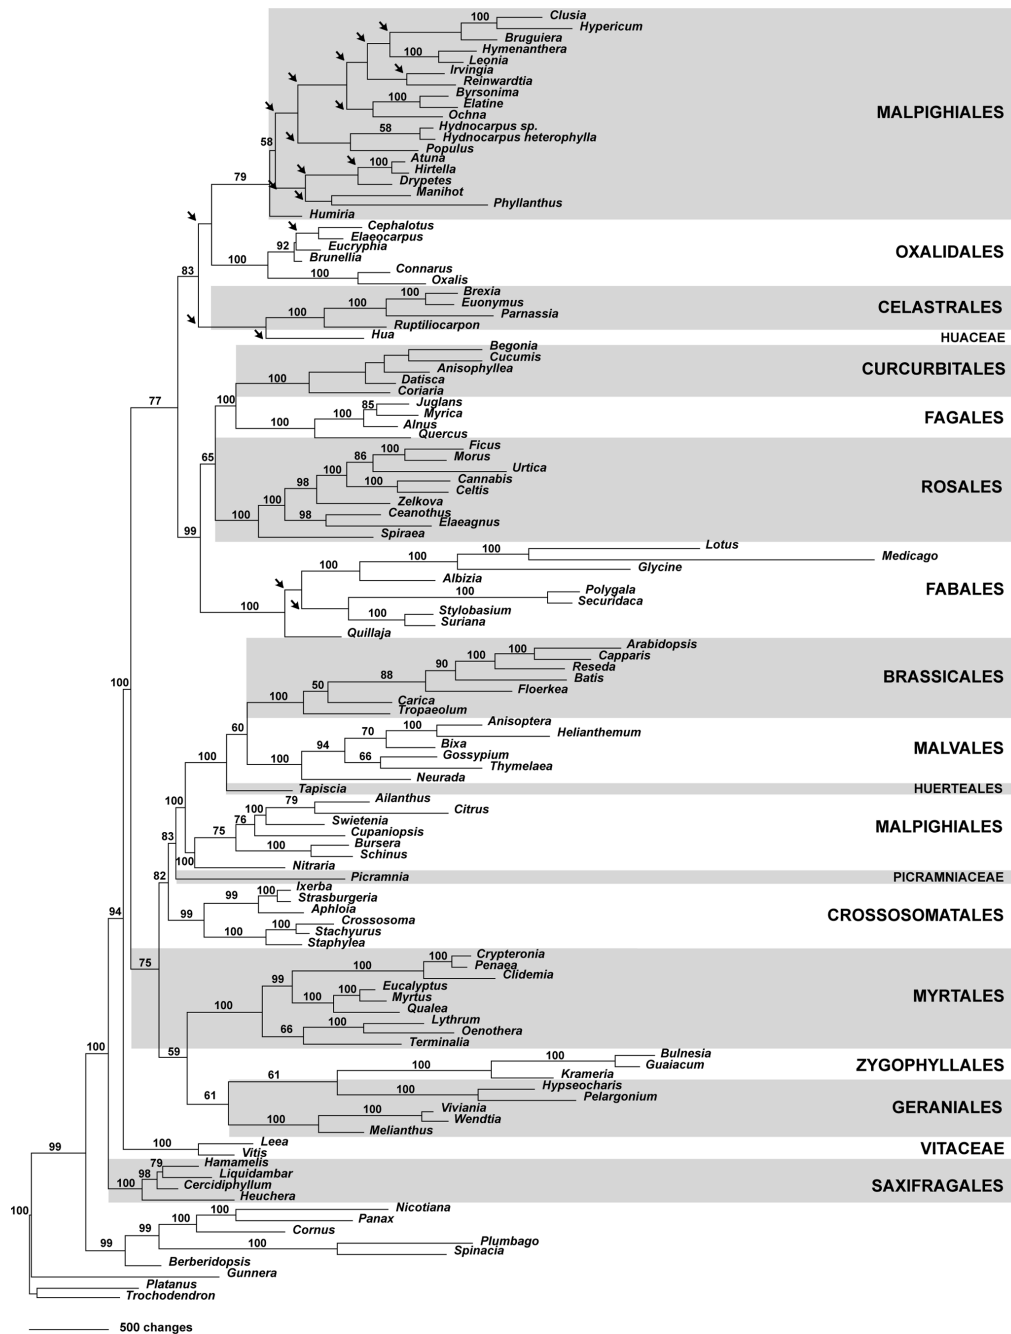

Fig. S1. Phylogram of 1 of 9 trees resulting from parsimony analysis of 12-gene dataset (2 nuclear and 10 plastid) and IR for 117 members of the rosid clade and outgroups (length 79,613, consistency index = 0.369, retention index = 0.433). Arrows designate nodes that collapse in the strict consensus. Numbers above branches are bootstrap values.

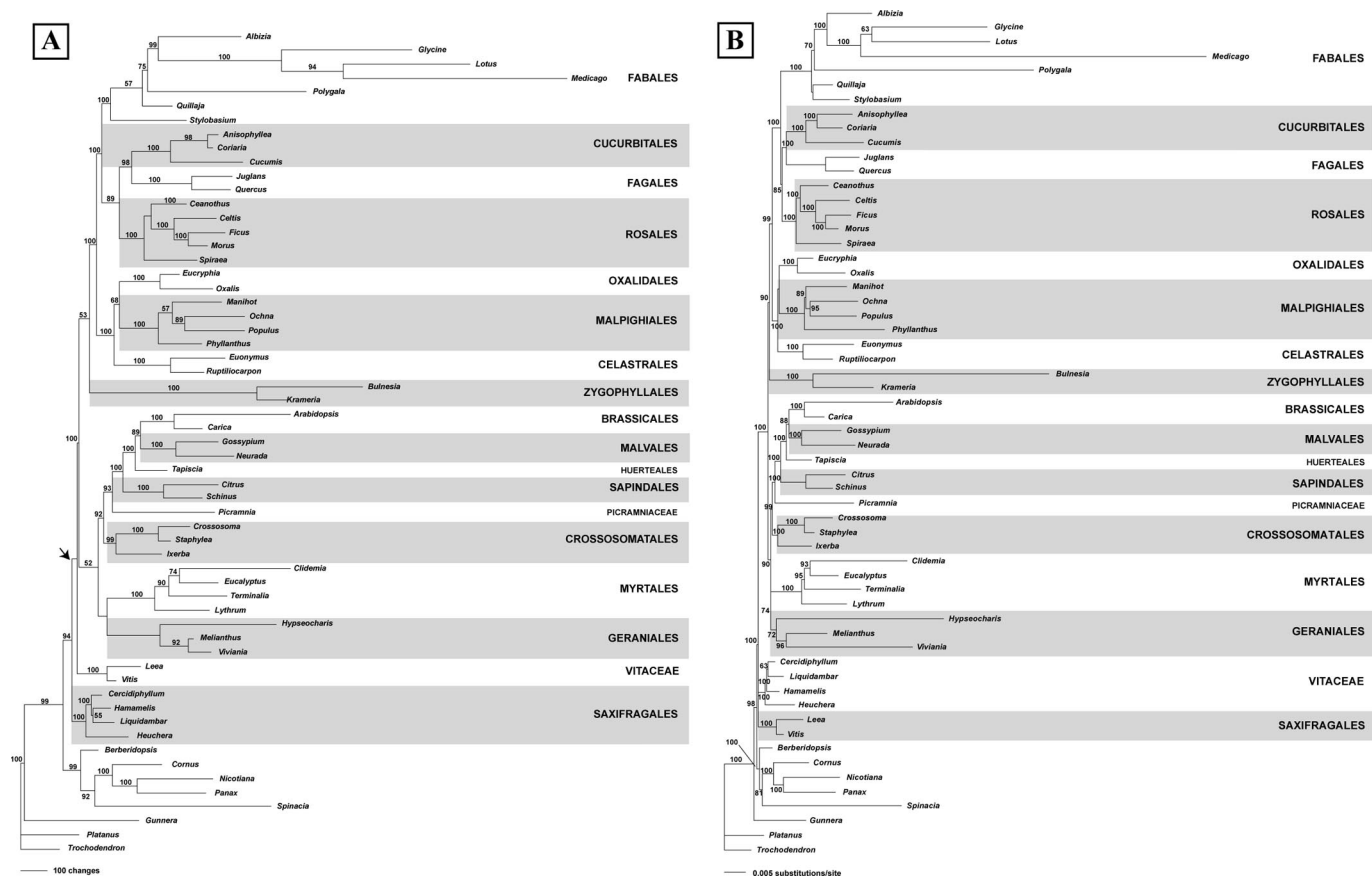

**Fig. S2.** Phylogenetic analyses of IR dataset for 59 taxa of the rosid clade and outgroups. (A) Phylogram of 1 of 4 most parsimonious trees. Bootstrap values are shown above branches. Arrows indicate nodes that collapse in the strict consensus. (B) Phylogram of ML tree.

**A**

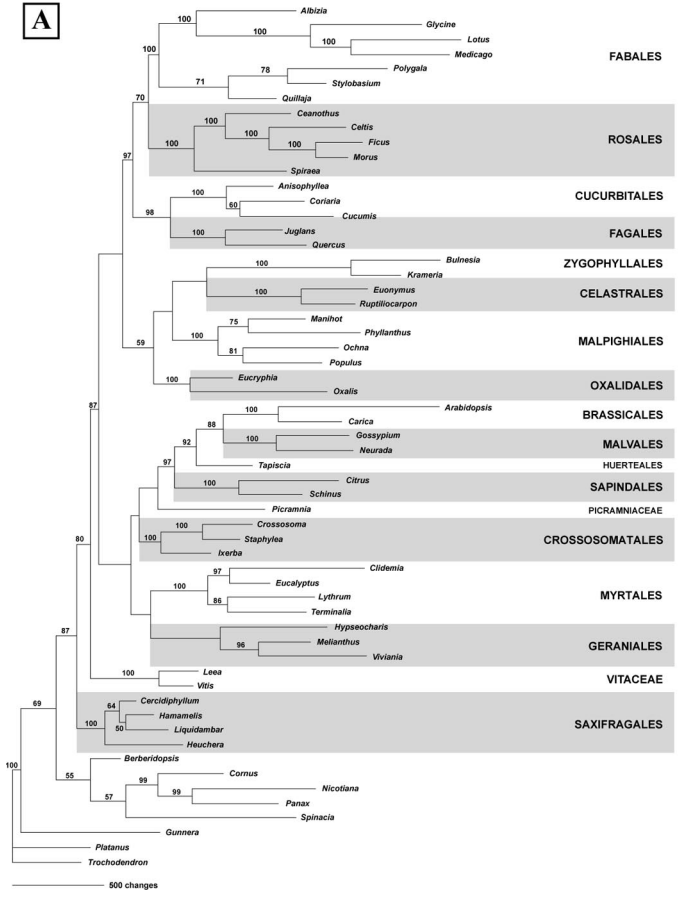

**B**

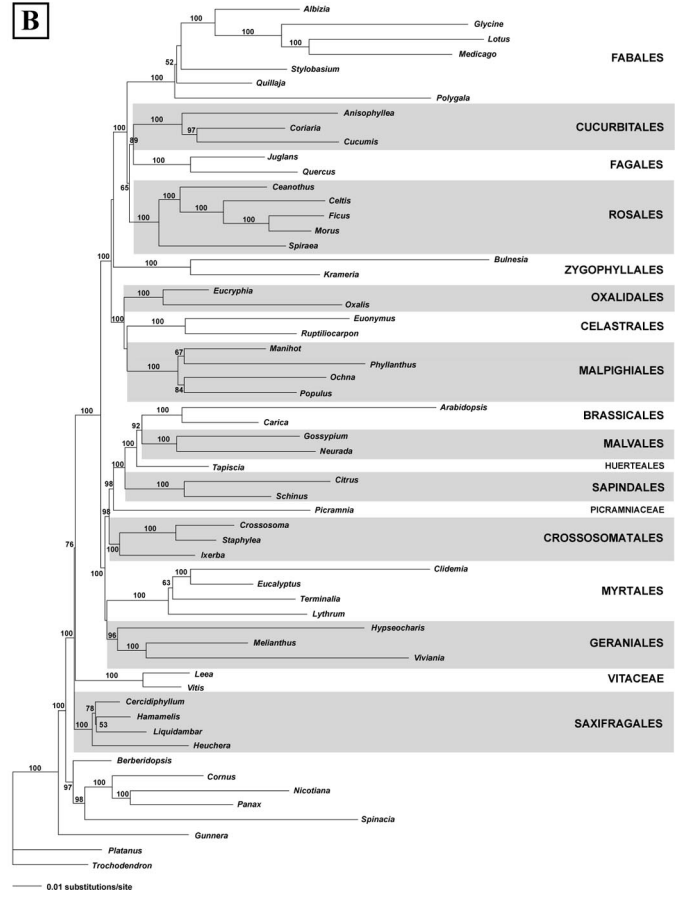

**Fig. S3.** Phylogenetic analyses of the 12-gene dataset (2 nuclear and 10 plastid) for 59 members of the rosid clade and outgroups. (A) Phylogram of the single tree resulting from MP analysis (length 34,843, consistency index = 0.374, retention index = 0.368). Numbers above branches are bootstrap values. (B) Phylogram of the ML tree.

**A**

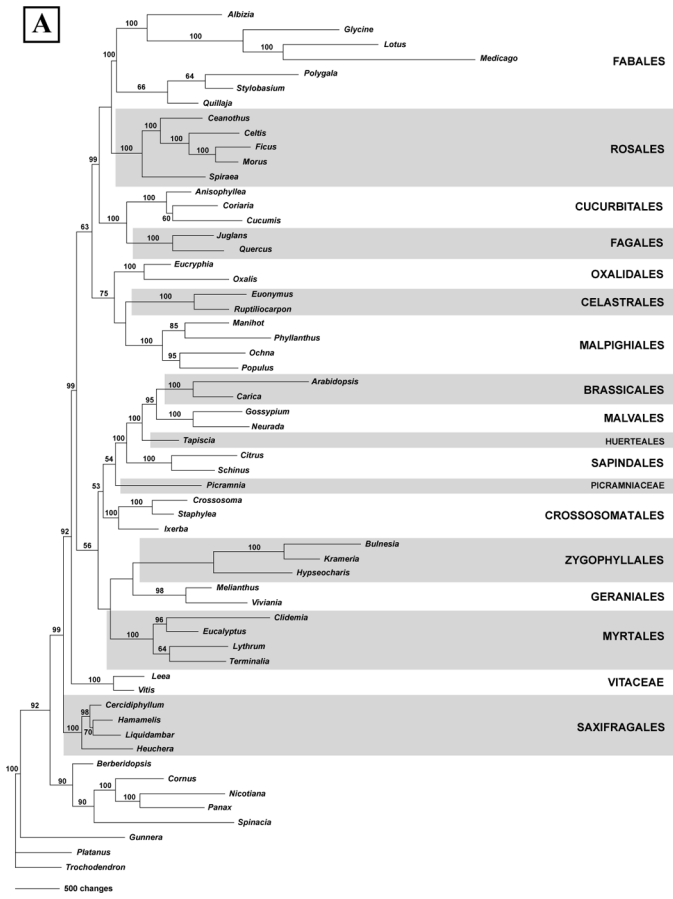

**B**

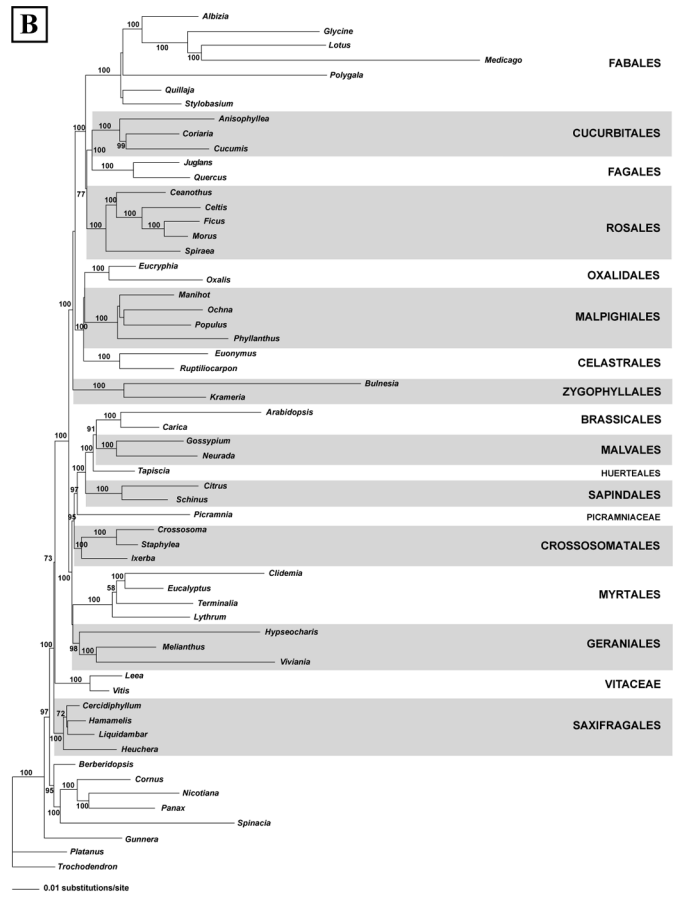

**Fig. S4.** Phylogenetic analyses of the total evidence dataset (2 nuclear genes, 10 plastid genes, and the IR) for 59 members of the rosid clade and outgroups. (A) Phylogram of the single tree resulting from MP analysis (length 53,418, consistency index = 0.476, retention index = 0.410). Numbers above branches are bootstrap values. (B) Phylogram of the ML tree.

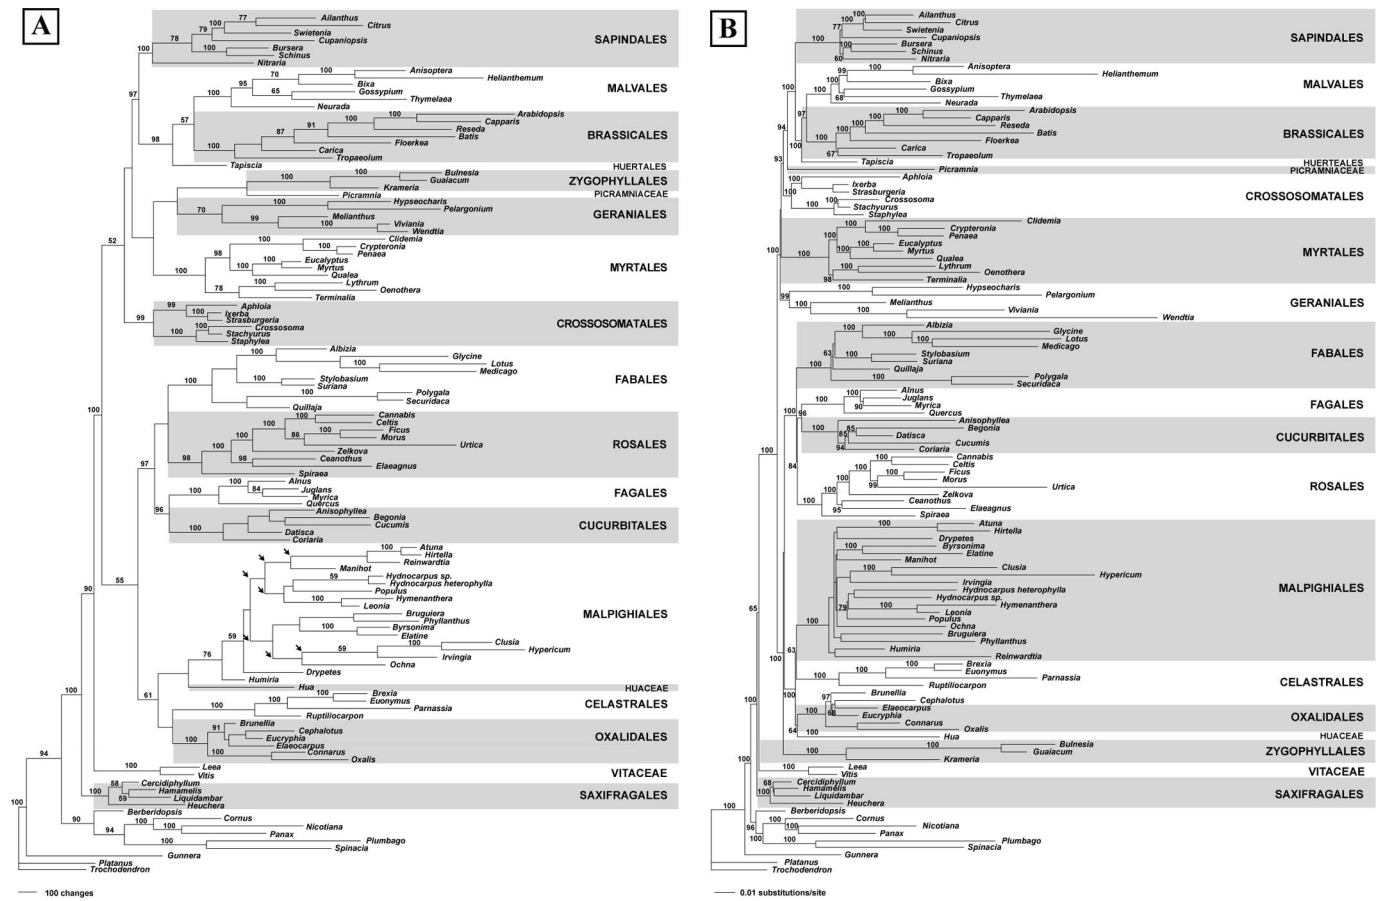

**Fig. 55.** Phylogenetic analyses of the 12-gene dataset (2 nuclear and 10 plastid) for 117 members of the rosid clade and outgroups. (A) Phylogram of 1 of 3 trees resulting from MP analysis (length 61,042, consistency index = 0.278, retention index = 0.417). Arrows designate nodes that collapse in the strict consensus. Numbers above branches are bootstrap values. (B) Phylogram of the ML tree.

**Table S1. MP and ML tree statistics for the different data sets employed in this study**

| Dataset (No. of Taxa)   | No. of MP Trees | MP tree length | CI    | RI    | GARLI ML score (MP score) |
|-------------------------|-----------------|----------------|-------|-------|---------------------------|
| Total Evidence (117)    | 9               | 79613          | 0.369 | 0.433 | 468184.55 (79700)         |
| Total Evidence (59)     | 1               | 53418          | 0.476 | 0.410 | 341883.36 (53460)         |
| Plastid + Nuclear (117) | 3               | 61042          | 0.278 | 0.417 | 316305.06 (61186)         |
| Plastid + Nuclear (59)  | 1               | 34843          | 0.374 | 0.368 | 190348.63 (34901)         |
| Inverted Repeat (59)    | 4               | 18525          | 0.671 | 0.526 | 146570.57 (18559)         |
| Nuclear (117)           | 35,466          | 5398           | 0.331 | 0.343 | 34291.19 (5476)           |

CI, consistency index; RI, retention index.

**Table S2. Primers used in this study**

| Gene           | Primer name                                                                    | Primer sequence                     | Ref.                    |
|----------------|--------------------------------------------------------------------------------|-------------------------------------|-------------------------|
| 26S rDNA       |                                                                                |                                     | 1                       |
| <i>matK</i>    |                                                                                |                                     | 2                       |
| <i>ndhF</i>    | 1F, 274F, 536F, 803F, 972F, 1318F; 536R, 803R, 972R, 1318R, 1603R, 2110R       |                                     | 3                       |
|                | 73F                                                                            | CCC TTC ATT CCR CTT CCA GTT CCT     | Designed for this study |
|                | 2153R                                                                          | GGA ATT CCA TCA ATK ATT CGT YTA TC  | Designed for this study |
| <i>psbBTNH</i> | 60F, B60F, B61F, 63F, 65F, 67F, 69F; 61R, B64R, 66R, B66R, 68R, 70R, 71R; B71R |                                     | 4                       |
| <i>rpoC2</i>   | 80F                                                                            | TAG ATC ACT TCG GAA TGG C           | Designed for this study |
|                | 750F                                                                           | GGT CGT GTA TTA GCR GAC G           | Designed for this study |
|                | 1000F                                                                          | GGT ATT ATT GCG GGT CAA TC          | Designed for this study |
|                | 1400F                                                                          | AGG GRG ARA TGG CAY TGG AG          | Designed for this study |
|                | 1950F                                                                          | GAT CCT CGA TAC AGA AGA AAG AGT TC  | Designed for this study |
|                | 2100F                                                                          | TCA TTC CCG AGG AAG TRC AT          | Designed for this study |
|                | 2600F                                                                          | CAA GTA TTC AAT TAG TTC GGA CTT G   | Designed for this study |
|                | 3000F                                                                          | CAT CTA ATT GTT TTC GAA TGG GTC C   | Designed for this study |
|                | 3400F                                                                          | CAT TYA ATT TGA ATT GGT ATT TTC TSC | Designed for this study |
|                | 1000R                                                                          | GAT TGA CCC GCA ATA ATA CC          | Designed for this study |
|                | 1400R                                                                          | CTC CAR TGC CAT YTC YCC CT          | Designed for this study |
|                | 1950R                                                                          | GAA CTC TTT CTT CTG TAT CGA GGA TC  | Designed for this study |
|                | 2100R                                                                          | ATG YAC TTC CTC GGG AAT GA          | Designed for this study |
|                | 2600R                                                                          | CAA GTC CGA ACT AAT TGA ATA CTT G   | Designed for this study |
|                | 3000R                                                                          | GGA CCC ATT CGA AAA CAA TTA GAT G   | Designed for this study |
|                | 3400R                                                                          | GGA GAA AAT ACC AAT TCA AAT TYA ATG | Designed for this study |
|                | 4200R                                                                          | TTT CAG GCC TTT YAR CCA RTC         | Designed for this study |
| <i>rps4</i>    | 1F, trnR                                                                       |                                     | 5                       |
|                | 48F                                                                            | GGC TTT ACC RGG ACT AAC             | Designed for this study |

Primer sequences are given only for primers that were designed specifically for this study.

1. Soltis DE, et al. (2000). Angiosperm phylogeny inferred from a combined data set of 18S rDNA, *rbcl*, and *atpB* sequences. *Bot J Linn Soc* 133:381–461.
2. Hilu KW, et al. (2003) Inference of angiosperm phylogeny based on *matK* sequence information. *Am J Bot* 90:1758–1776
3. Olmstead RG, Sweere JA (1994) Combining data in phylogenetic systematics: An empirical approach using three molecular data sets in the Solanaceae. *Syst Biol* 43:467–481.
4. Graham SW, Olmstead RG (2000) Utility of 17 chloroplast genes for inferring the phylogeny of the basal angiosperms. *Am J Bot* 87:1712–1730.
5. Souza-Chies TT, et al. (1997) Phylogenetic analysis of Iridaceae with parsimony and distance methods using the plastid gene *rps4*. *Plant Syst Evol* 204:109–123.

Table S3. Gene/partition characteristics

| Gene/partition                       | Number of missing taxa | Total aligned length | Analyzed aligned length | Number of parsimony-informative characters |
|--------------------------------------|------------------------|----------------------|-------------------------|--------------------------------------------|
| 18S rDNA                             | 12                     | 1832                 | 1707                    | 244                                        |
| 26S rDNA                             | 39                     | 3477                 | 3213                    | 526                                        |
| total nuclear                        | 9                      | 5309                 | 4920                    | 770                                        |
| <i>atpB</i>                          | 9                      | 1528                 | 1431                    | 527                                        |
| <i>matK</i>                          | 23                     | 1845                 | 1632                    | 1,066                                      |
| <i>ndhF</i>                          | 8                      | 2532                 | 2124                    | 1221                                       |
| <i>psbB</i>                          | 9                      | 1530                 | 1464                    | 486                                        |
| <i>psbH</i>                          | 9                      | 237                  | 141                     | 54                                         |
| <i>psbN</i>                          | 9                      | 132                  | 129                     | 38                                         |
| <i>psbT</i>                          | 9                      | 129                  | 111                     | 28                                         |
| <i>rbcL</i>                          | 0                      | 1434                 | 1395                    | 495                                        |
| <i>rpoC2</i>                         | 7                      | 5037                 | 4143                    | 2,302                                      |
| <i>rps4</i>                          | 7                      | 810                  | 591                     | 292                                        |
| IR                                   | 58                     | 25549                | 25549                   | 4,300                                      |
| total plastid targeted genes (no IR) | 0                      | 40763                | 38710                   | 6,509                                      |
| total targeted genes (no IR)         | 0                      | 20523                | 18081                   | 7,279                                      |
| total evidence                       | 0                      | 46072                | 43630                   | 11,579                                     |

Number of missing taxa refers to the number of taxa in the total evidence data set that lack sequence for a given gene or partition; analyzed aligned length refers to the total aligned length minus excluded characters. The *psbB/psbT/psbN/psbH* and *rps4/trnV* spacer regions were sequenced but were not included in analyses, and so these regions are excluded from the numbers in this table.



Table S4. Fossil treatments

| Clade                            | Assigned minimum age, Mya | Anchor fossil (and ref.)                                            | UCLN-uniform   | UCLN-lognormal |
|----------------------------------|---------------------------|---------------------------------------------------------------------|----------------|----------------|
| Simaroubaceae-Rutaceae-Meliaceae | E. Eocene, 50             | <i>Ailanthus</i> (1)                                                | $U(50, 125)$   | $Ln(0, 1)$     |
| Burseraceae-Anacardiaceae        | E. Eocene, 50             | <i>Bursericarpum</i> , <i>Choerospondias</i> (2)                    | $U(50, 125)$   | $Ln(0, 1)$     |
| Malvaceae s.l.                   | Maastrichtian, 65.5–70.6  | <i>Parabombacaceoxylon</i> , <i>Javelinoxylon</i> (3, 4)            | $U(70.6, 125)$ | $Ln(0, 1)$     |
| Myrtales                         | Paleocene, 60             | <i>Paleomyrtinaea</i> (5)                                           | $U(60, 125)$   | $Ln(0, 1)$     |
| Fagales                          | Santonian, 85             | <i>Bedelia</i> , <i>Caryanthus</i> , <i>Antiquocupula</i> (6, 7, 8) | $U(85, 125)$   | $Ln(0, 1)$     |
| <i>Celtis-Cannabis</i>           | Paleocene, 60             | <i>Celtis</i> (9)                                                   | $U(60, 125)$   | $Ln(0, 1)$     |
| <i>Clusia/Hypericum</i>          | Turonian, 90              | <i>Paleoclusia</i> (10)                                             | $U(90, 125)$   | $Ln(0, 1)$     |

Information on fossils used in divergence time estimation. The assigned minimum ages were used as the zero offset in the BEAST analysis. UCLN-uniform corresponds to the BEAST analysis that treated fossils as being drawn from a uniform distribution  $U(\text{minimum}, \text{maximum})$ ; UCLN-lognormal corresponds to the BEAST analysis that treated fossils as being drawn from a lognormal distribution  $Ln(\text{mean}, \text{standard deviation})$ . We treated the age of the root node as follows: For PL analyses, we treated it as (i) a fixed age calibration (at 125 million years, based on the Barremian fossil record of tricolpate pollen indicative of eudicots), and (ii) as a maximum age constraint of 125 million years. All other fossils were treated as minimum age constraints. For the UCLN analyses, we treated distribution of the age of the root node as a uniform distribution between 90 (the oldest fossil used in our analyses: *Paleoclusia*, placed as a constraint relative to *Clusia/Hypericum*) and 125 million years [ $U(90, 125)$ ]. The UCLN model allows uncertainty in the age of calibrations to be represented as prior distributions rather than as strict calibration/fix points. We therefore constrained several of the nodes in the tree to prior probability distributions. Fossils were treated as a uniform distribution between the first occurrence of the fossil and the maximum age of the clade (i.e., 125 million years). In addition, MCMC runs were performed in which we modeled the fossil priors as lognormal distribution. This explicitly assumes that the actual divergence event is more likely to have occurred at some time prior to the minimum age of the fossil. In each case the "zero offset" value in BEAST was set to the minimum age of the fossil. The selection of the mean and standard deviation is somewhat subjective. For our fossils, we set the mean to zero and the standard deviation to one, to insure that 95% of the distribution fell within the maximum set age of the clade.

1. Corbett SR, Manchester SR (2004) Phylogeography and fossil history of *Ailanthus* (Simaroubaceae). *Int J Plant Sci* 165:671–690.
2. Collinson ME, Cleal CJ (2001) Introduction to the Mesozoic and Tertiary palaeobotany of Great Britain, in *Mesozoic and Tertiary palaeobotany of Great Britain*, eds Cleal CJ, Thomas BA, Batten DJ, Collinson ME (Geological Conservation Review Series No. 22, Peterborough: Joint Nature Conservation Committee), pp 187–226.
3. Wheeler EA, Lee M, Matten LC (1987) Dicotyledonous woods from the Upper Cretaceous of Southern Illinois. *Bot J Linn Soc* 95:77–100.
4. Wheeler EA, Lehman TM, Gasson PE (1994) *Javelinoxylon*, a new genus of malvalean tree from the Upper Cretaceous and Paleocene of San Juan Basin, New Mexico, USA. *Amer J Bot* 81:703–710.
5. Pigg KB, Stockey RA, Maxwell SL (1992) *Paleomyrtinaea*, a new genus of permineralized myrtaceous fruits and seeds from the Eocene of British Columbia and Paleocene of North Dakota. *Can J Bot* 71:1–9.
6. Sims HJ, Herendeen PS, Lupia R, Christopher RA, Crane PR (1999) Fossil flowers with Normapolles pollen from the Late Cretaceous of southeastern North America. *Rev Palaeo and Palynol* 106:131–151.
7. Friis EM (1983) Upper Cretaceous (Senonian) floral structures of juglandalean affinity containing Normapolles pollen. *Rev Paleo Palynol* 39:161–188.
8. Sims HJ, Herendeen PS, Crane PR (1998) A new genus of fossil Fagaceae from the Campanian (Late Cretaceous) of central Georgia, U.S.A. *Int J Plant Sci* 159:391–404.
9. Manchester SR, Akhmetiev MA, Kodrul T (2002) Leaves and fruits of *Celtis aspera* (Newberry) comb. nov. (Celtidaceae) from the Paleocene of North America and eastern Asia. *Int J Plant Sci* 163:725–736.
10. Crepet WL, Nixon KC (1998) Fossil Clusiaceae from the Late Cretaceous (Turonian) of New Jersey and implications regarding the history of bee pollination. *Amer J Bot* 85: 1122–1133.

## Other Supporting Information

[SI Appendix](#)
